# Supplementary material for: A meta‐analysis of anal cancer incidence by risk group: Toward a unified anal cancer risk scale
Source: PubMed Central journal article supplement — Int J Cancer. 2020 Jul 29;148(1):38–47. doi: 10.1002/ijc.33185 (PMC7689909; doi:10.1002/ijc.33185), 2020-07-29
Supplement: IJC-148-38-s001.pdf [file IJC-148-38-s001.pdf]

## Supplementary Material

### **A meta-analysis of anal cancer incidence by risk group: towards a unified anal cancer risk scale**

Gary M. Clifford, Damien Georges, Meredith S. Shiels, Eric A. Engels, Andreia Albuquerque, I. Mary Poynten,  
Alexandra de Pokomandy, Alexandra M. Easson and Elizabeth A. Stier

#### Table of Contents

**Supplementary Table 1.** Age-specific anal cancer incidence, U.S. HIV Cancer Match study, 1996-2015..... page 2

**Supplementary Table 2.** Age-specific anal cancer incidence in studies of women with CIN3..... page 2

**Supplementary Table 1.** Age-specific anal cancer incidence, U.S. HIV Cancer Match study, 1996-2015

| Age group (years) | HIV Risk group |              |                                       |               |              |                                       |         |              |                                       |
|-------------------|----------------|--------------|---------------------------------------|---------------|--------------|---------------------------------------|---------|--------------|---------------------------------------|
|                   | MSM            |              |                                       | Non-MSM males |              |                                       | Females |              |                                       |
|                   | cases          | person-years | IR per 100,000 person-years (95% CIs) | cases         | person-years | IR per 100,000 person-years (95% CIs) | cases   | person-years | IR per 100,000 person-years (95% CIs) |
| <30               | 32             | 190,168      | 16.8 (11.5-23.8)                      | 2             | 99,327       | 2.0 (0.2-7.3)                         | 7       | 150,038      | 4.7 (1.9-9.6)                         |
| 30-44             | 533            | 805,573      | 66.2 (60.7-72.0)                      | 131           | 492,496      | 26.6 (22.2-31.6)                      | 91      | 532,692      | 17.1 (13.8-21.0)                      |
| 45-59             | 695            | 696,830      | 99.7 (92.5-107.4)                     | 246           | 674,139      | 36.5 (32.1-41.3)                      | 136     | 458,248      | 29.7 (24.9-35.1)                      |
| ≥60               | 123            | 114,467      | 107.5 (89.3-128.2)                    | 49            | 144,168      | 34.0 (25.1-44.9)                      | 19      | 82,520       | 23.0 (13.9-36.0)                      |

IR=incidence rate. MSM=men who have sex with men.

**Supplementary Table 2.** Age-specific anal cancer incidence in studies of women with CIN3

| Age group (years) | Edgren, Lancet Oncol, 2007 |              |                                       | Ebisch, J Clin Oncol, 2017* |              |                                       | Pooled |              |                                       |
|-------------------|----------------------------|--------------|---------------------------------------|-----------------------------|--------------|---------------------------------------|--------|--------------|---------------------------------------|
|                   | cases                      | person-years | IR per 100,000 person-years (95% CIs) | cases                       | person-years | IR per 100,000 person-years (95% CIs) | cases  | person-years | IR per 100,000 person-years (95% CIs) |
| 18-39             | 8                          | 646,589      | 1.2 (0.5-2.4)                         | 11                          | 852,810      | 1.3 (0.6-2.3)                         | 19     | 1,499,399    | 1.3 (0.8-2.0)                         |
| 40-59             | 73                         | 1,201,058    | 6.1 (4.8-7.6)                         | 55                          | 372,690      | 14.8 (11.1-19.2)                      | 128    | 1,573,748    | 8.1 (6.8-9.7)                         |
| ≥60               | 50                         | 345,762      | 14.5 (10.7-19.1)                      | 7                           | 34,408       | 20.3 (8.2-41.9)                       | 57     | 380,170      | 15.0 (11.4-19.4)                      |

\*personal communication. CIN=cervical intraepithelial neoplasia. IR=incidence rate.
